# Supplementary material for: Effect of temperature on self-assembly/disassembly transition of dialkylurea supramolecular gels at high pressure
Source: Royal Society of Chemistry journal article supplement (doi:10.1039/c3ra41540f), 2013-01-01
Supplement: c3ra41540f.pdf [file c3ra41540f.pdf]

*Electronic Supplementary Information for:*

## **Effect of temperature on self-assembly/disassembly transition of dialkylurea supramolecular gels under high pressure**

Huabo Huang<sup>a</sup>, Hong Wang<sup>a</sup>, Lei Su<sup>b\*</sup>, Xiang Zhu<sup>b</sup>, Yajiang Yang<sup>a\*</sup>

<sup>a</sup>School of Chemistry and Chemical Engineering, Huazhong University of Science and Technology, Wuhan 430074, China. <sup>b</sup>Department of Physics, Zhengzhou University of Light Industry, Zhengzhou 450002, China.

\* E-mail: yjyang@mail.hust.edu.cn (Y. Yang)

### **Supplementary data**

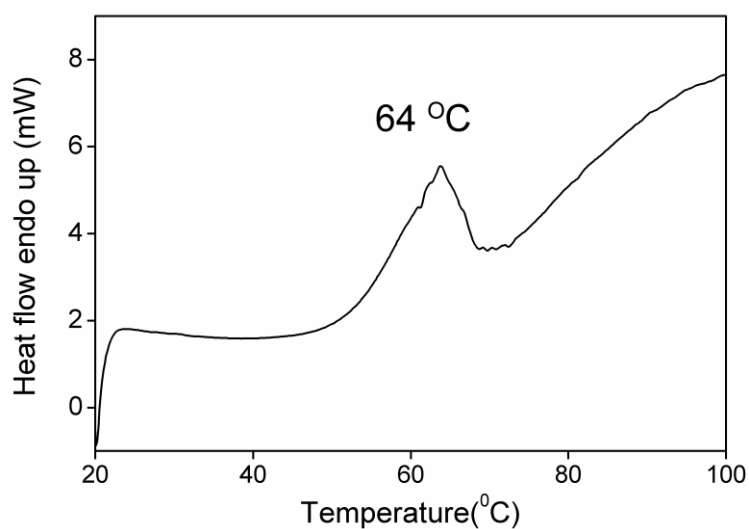

**Figure S1.** DSC thermograms of MBB-18/CB gel. There is an obvious endothermic peak at 64 °C, indicating the self-assembly/disassembly transition of MBB-18.

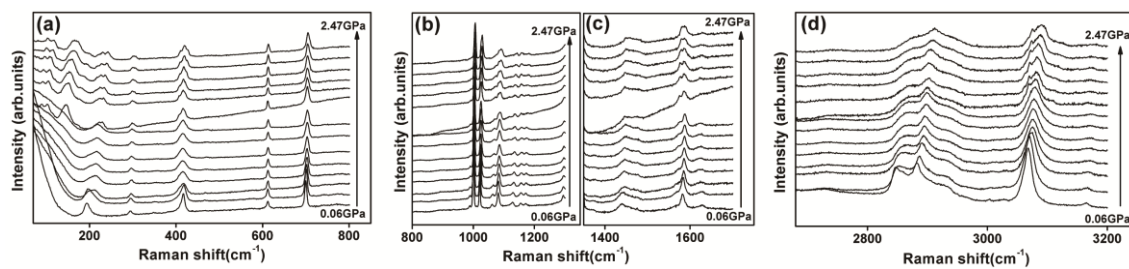

**Figure S2.** Raman spectra of MBB-18/CB gels under varied pressures at 60 °C.

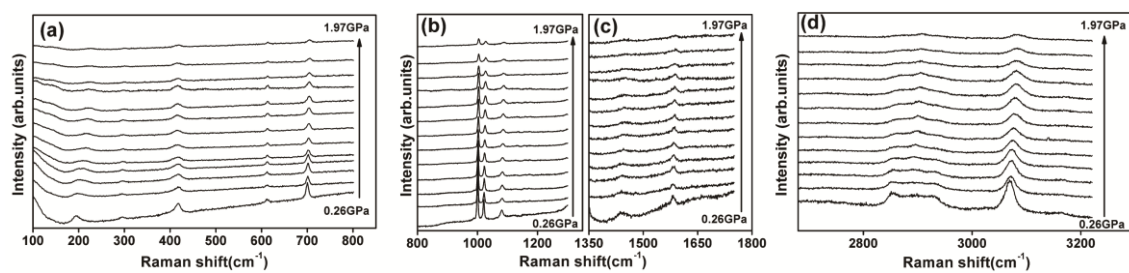

**Figure S3.** Raman spectra of MBB-18/CB gels under varied pressures at 150 °C.

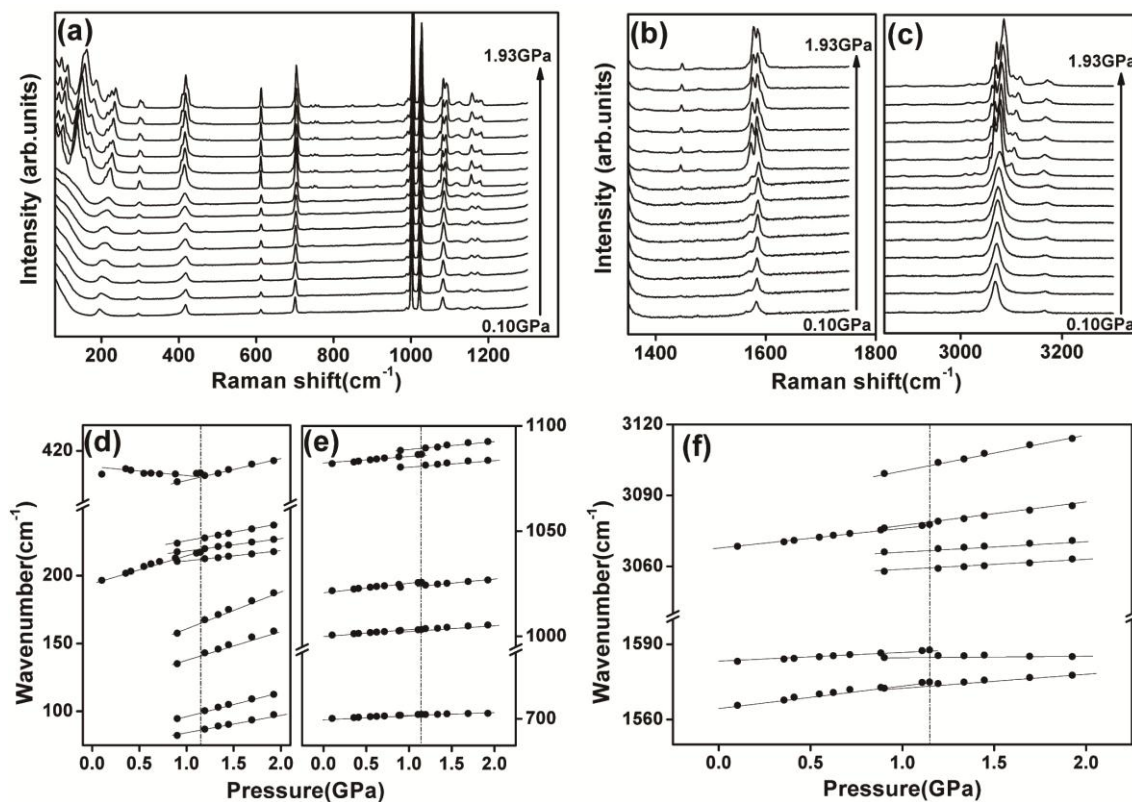

**Figure S4.** Raman spectra of chlorobenzene under varied pressures at 23 °C (a–c) and the pressure dependence of the characteristic bands (d–f). The dashed lines represent the boundary of the two phases. There is an obvious discontinuity at ~1.15 GPa, indicating the phase transition.

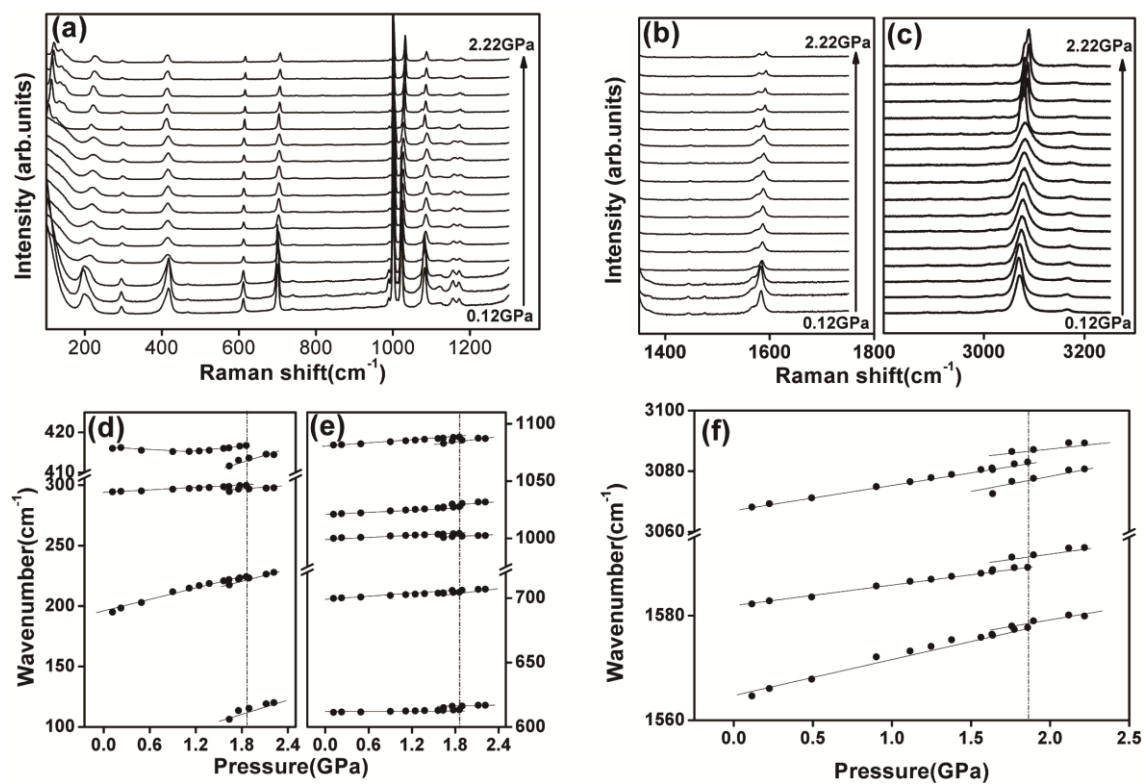

**Figure S5.** Raman spectra of chlorobenzene under varied pressures at 80 °C (a–c) and the pressure dependence of the characteristic bands (d–f). There is an obvious discontinuity at ~1.86 GPa, indicating the phase transition.

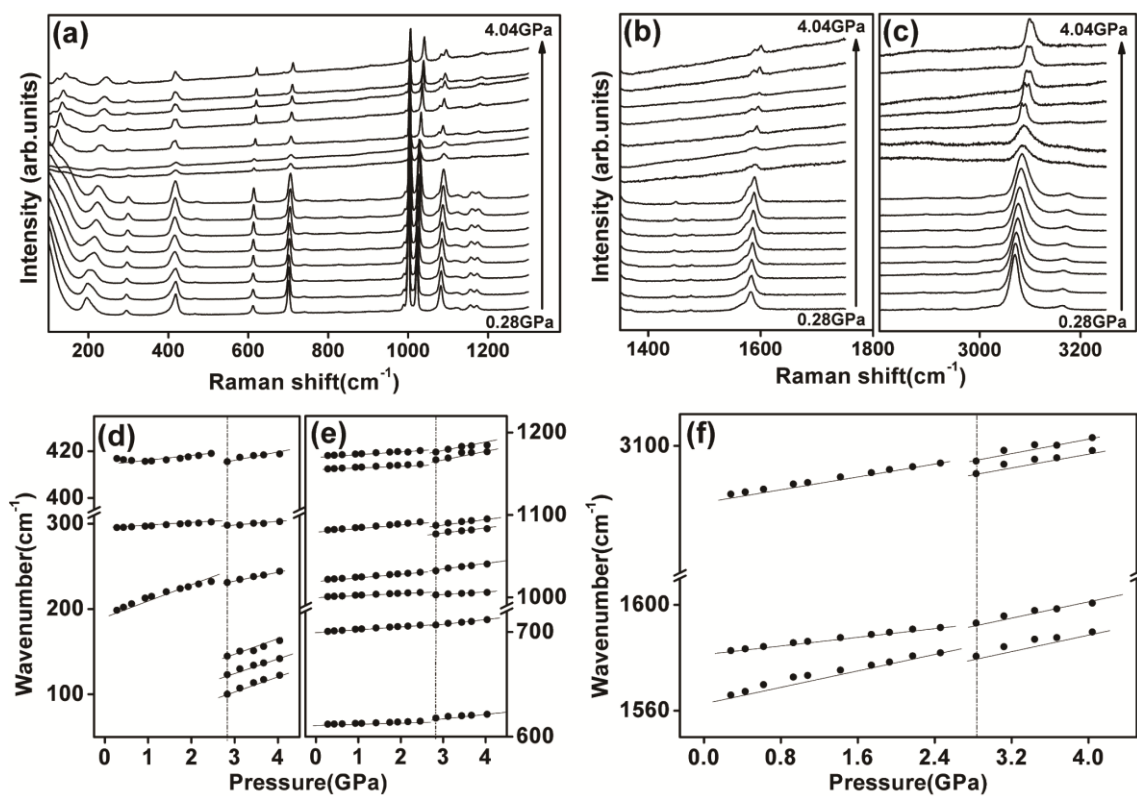

**Figure S6.** Raman spectra of chlorobenzene under varied pressures at 150 °C (a–c) and the pressure dependence of the characteristic bands (d–f). There is an obvious discontinuity at ~2.83 GPa, indicating the phase transition.
